# Supplementary material for: First Evidence of Bud Feeding-Induced RNAi in a Crop Pest via Exogenous Application of dsRNA
Source: PubMed Central journal article supplement (PMC7694955; doi:10.3390/insects11110769), 2020-11-07
Supplement: insects-11-00769-s001.pdf [file insects-11-00769-s001.pdf]

## Supplementary material

Table S1. *Green fluorescent protein (gfp)* and *Brassicogethes aeneus coatomer subunit alpha ( $\alpha$ COP)* regions for *in vitro* dsRNA synthesis.

| Gene                          | Name                             | Length of region (bp) for dsRNA synthesis | Sequence of gene region                                                                                                                                                                                                                                                                                                                                                                                                                                                                                                      |
|-------------------------------|----------------------------------|-------------------------------------------|------------------------------------------------------------------------------------------------------------------------------------------------------------------------------------------------------------------------------------------------------------------------------------------------------------------------------------------------------------------------------------------------------------------------------------------------------------------------------------------------------------------------------|
| <i><math>\alpha</math>COP</i> | <i>coatomer subunit alpha</i>    | 222                                       | AAGATGCACCACATAATGGACATTTTTCTTCAG<br>GTTTTCTCTGTAAATGGGGGTGTATGAATAAC<br>CACAAATCGAAAATGGATTATGTTTCATCGTAAT<br>TTAATTGAAGTTCATCTGTAAATTAGAGTCAC<br>AGGCCTGTAAAATTTTTCTTGCCTGCTGAGCCA<br>CCTCAGGACGTGGGCCCAATTCCAATAGCCTCT<br>TGGCCAGCGAAGACG                                                                                                                                                                                                                                                                                 |
| <i>gfp</i>                    | <i>green fluorescent protein</i> | 455                                       | TACGGCGTGCAGTGCTTCAGCCGCTACCCCGAC<br>CACATGAAGCAGCAGACTTCTTCAAGTCCGCC<br>ATGCCCGAAGGCTACGTCCAGGAGCGACCATC<br>TTCTTCAAGGACGACGGCAACTACAAGACCCGC<br>GCCGAGGTGAAAGTTCGAGGGCGACACCCTGGT<br>GAACCGCATCGAGCTGAAGGGCATCGACTTCA<br>AGGAGGACGGCAACATCCTGGGGCACAAGCTG<br>GAGTACAACACTACAACAGCCACAACGTCTATATC<br>ATGGCCGACAAGCAGAAGAACGGCATCAAGGT<br>GAACTTCAAGATCCGCCACAACATCGAGGACG<br>GCAGCGTGCAGCTCGCCGACCACTACCAGCAG<br>AACACCCCCATCGGCGACGGCCCCGTGCTGCTG<br>CCCGACAACCACTACCTGAGCACCCAGTCCGCC<br>CTGAGCAAAGACCCCAACGAGAAGCGCGATCA |

Table S2. Primer amplification efficiencies of genes used in the present study.

| Gene                          | Name                             | Forward (5' to 3')        | Reverse (5' to 3')    | PCR type and efficiency (%) |
|-------------------------------|----------------------------------|---------------------------|-----------------------|-----------------------------|
| <i>gfp</i>                    | <i>green fluorescent protein</i> | CACATGAAGCAGCAGACTT       | TGCTCAGGTAGTGGTTGTCTG | RT-PCR                      |
| <i><math>\alpha</math>COP</i> | <i>coatomer subunit alpha</i>    | CCAACTTGGTCATTTAACAATCTGG | CCCTTCCTTCATCATGGACA  | qPCR, 107.8                 |
| <i>rps3</i>                   | <i>ribosomal protein S3</i>      | CCAACGCGTACCGAAATTAT      | GAGTTTTCGGGGAAGTTGAA  | qPCR, 100                   |
| <i>act</i>                    | <i>actin</i>                     | TCACGGACAATTTCCCTTTC      | TATCCTCCGTTTGACTTGG   | qPCR, 90.8                  |
